# Supplementary material for: Web-Based and Mobile Stress Management Intervention for Employees: A Randomized Controlled Trial
Source: PubMed Central journal article supplement (PMC4749847; doi:10.2196/jmir.5112), 2016-01-27
Supplement: jmir_v18i1e21_app1.pdf [file jmir_v18i1e21_app1.pdf]

## Supplemental material

### Screenshots of the intervention

Picture 1: Starting page of the training

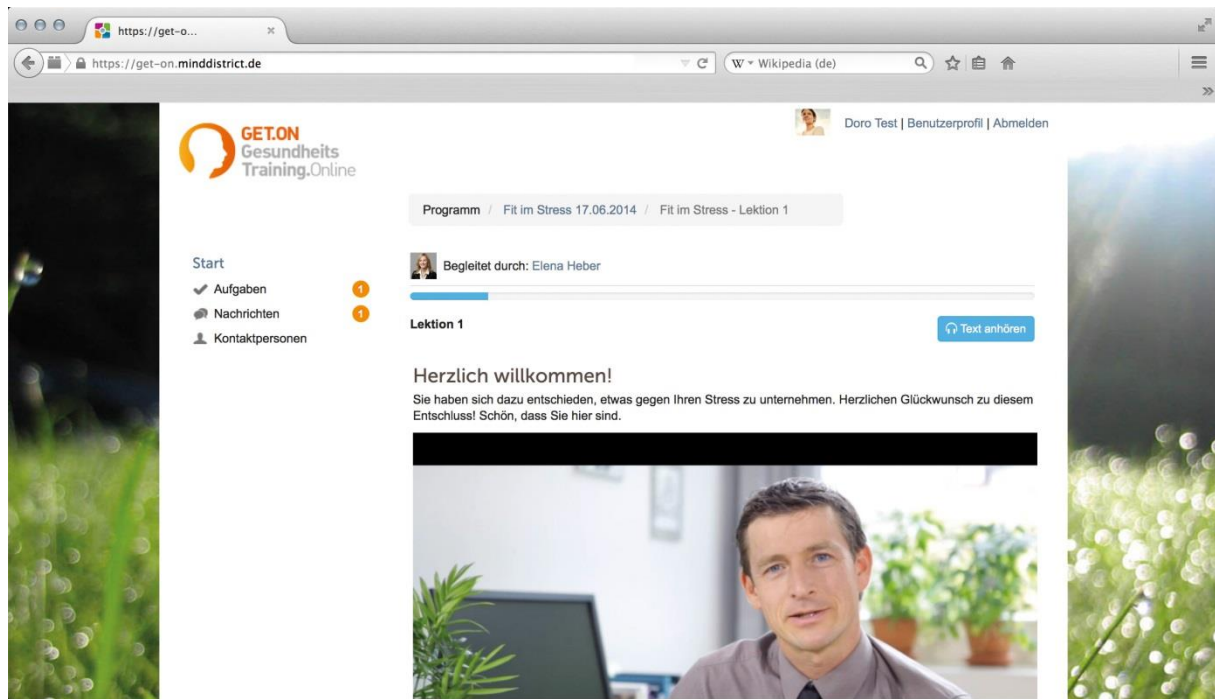

Picture 2: Six-step procedure within the problem-solving module

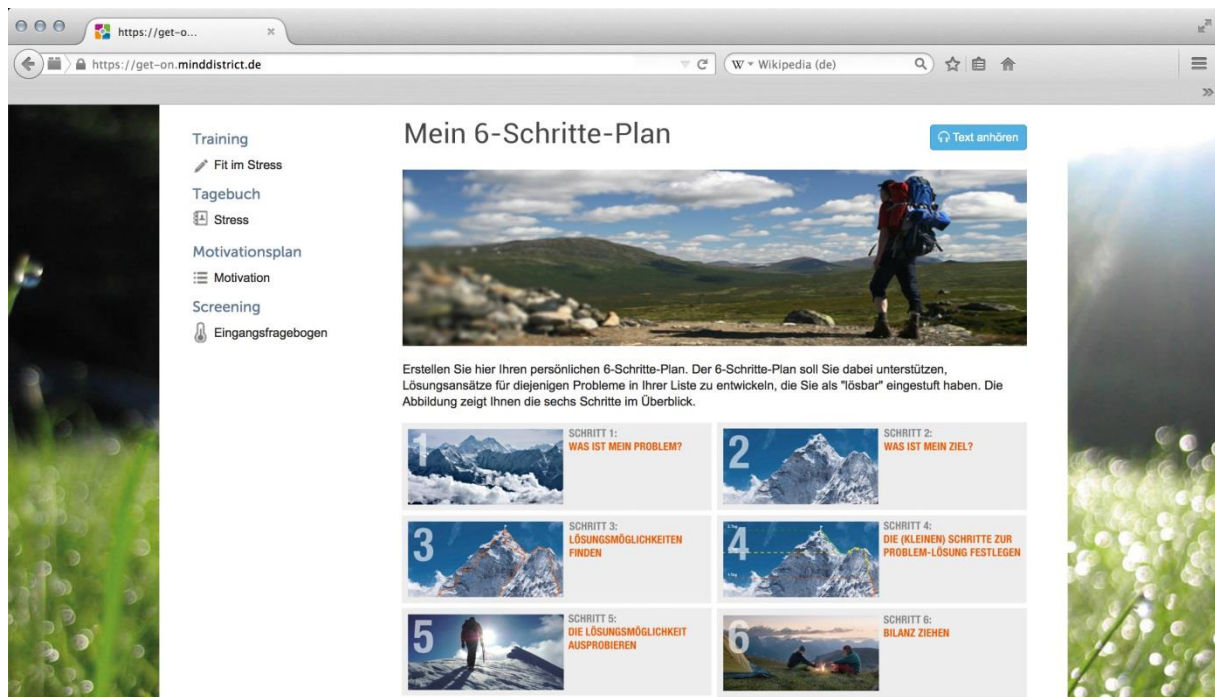

Picture 3: Exercise within the emotion regulation module

https://get-on...  
 https://get-on.minddistrict.de

W - Wikipedia (de)

Nachrichten  
 Kontaktpersonen

## Der Sinn und Nutzen von Gefühlen Text anhören

*"Es sind nicht die äußeren Umstände die das Leben verändern, sondern die inneren Veränderungen die sich im Leben äußern." (Wilma Thomalla)*

Auch schwierige Gefühle haben einen Sinn und Nutzen  
 Bevor wir uns der eigentlichen Akzeptanz schwieriger Emotionen widmen, kann es hilfreich sein, sich zur Vorbereitung einmal Gedanken darüber zu machen, welchen positiven Nutzen (schwierige) Gefühle eigentlich haben. Das erleichtert uns später das Akzeptieren. Denn wenn schwierige Gefühle nur nachteilig wären, hätten sich diese in der Evolution sicher nicht durchgesetzt.

Was ist die positive Funktion von Stress?  
 Stress ermöglicht uns durch die Mobilisierung von Energiereserven, unsere Zielerreichung zu gewährleisten, z.B. den Abschluss eines wichtigen Projektes in kurzer Zeit. Ganz nach dem Motto: unter Druck entstehen Diamanten.

[Das Säbelzahniger-Beispiel](#)

Übung: Welchen Nutzen haben diese schwierigen Emotionen?

Picture 4: Planning of positive activities

https://get-on...  
 https://get-on.minddistrict.de

W - Wikipedia (de)

Training  
 Fit im Stress  
 Tagebuch  
 Stress  
 Motivationsplan  
 Motivation  
 Screening  
 Eingangsfragebogen

## Meine Kraftgeber planen

Planen Sie hier, welche Kraftgeber Sie in den nächsten Tagen bis zum Bearbeiten der zweiten Lektion durchführen möchten. Ein guter Richtwert ist es, täglich einen kleineren (5-15 Minuten) sowie einmal die Woche einen größeren Kraftgeber einzuplanen (60-90 Minuten).

| Wochentag  | Mein Kraftgeber           |                              |
|------------|---------------------------|------------------------------|
| Montag     | Kochen mit Frank          | ✗                            |
| Dienstag   | Zumba-Kurs                | ✗                            |
| Mittwoch   | Buch lesen                | ✗                            |
| Donnerstag | Pausenplausch mit Cordula | ✗                            |
| -          |                           | ✗                            |
|            |                           | <a href="#">+ Hinzufügen</a> |

Manchen Menschen fällt es schwer, sich etwas Gutes zu gönnen. Hier finden Sie die Vorlage eines Rezeptes, in das Sie Ihre Kraftgeber für die nächsten Tage übertragen und sich so selbst "verschreiben" können. Das erhöht die Verbindlichkeit und macht klar: Kraftgeber sind wichtig für die Gesundheit!
